# Supplementary material for: Single plasmid systems for inducible dual protein expression and for CRISPR-Cas9/CRISPRi gene regulation in lactic acid bacterium Lactococcus lactis
Source: PubMed Central journal article supplement (PMC5772564; doi:10.1038/s41598-018-19402-1), 2018-01-17
Supplement: 41598_2018_19402_MOESM1_ESM.pdf [file 41598_2018_19402_MOESM1_ESM.pdf]

## Supplementary Information

### Single plasmid tools for dual protein expression and CRISPR/Cas9 in lactic acid bacterium *Lactococcus lactis*:

Aleš Berlec<sup>a,\*</sup>, Katja Škrlec<sup>a,b</sup>, Janja Kocjan<sup>a,d</sup>, Maria Olenic<sup>a,c</sup>, Borut Štrukelj<sup>a,d</sup>

<sup>a</sup> Department of Biotechnology, Jožef Stefan Institute, Jamova 39, SI-1000, Ljubljana, Slovenia

<sup>b</sup> Graduate School of Biomedicine, Faculty of Medicine, University of Ljubljana, SI-1000, Ljubljana, Slovenia

<sup>c</sup> Faculty of Pharmacy, Charles University in Prague, 500 05, Hradec Králové, Czech Republic

<sup>d</sup> Faculty of Pharmacy, University of Ljubljana, Aškerčeva 7, SI-1000, Ljubljana, Slovenia

Supplementary Table S1: Primers and plasmids used in the study.

| Primer or plasmid  | Primer sequence or plasmid feature                           | Reference  |
|--------------------|--------------------------------------------------------------|------------|
| <i>Primers</i>     |                                                              |            |
| NZ_NdeI-del_F      | CTTGATTATATCAAAGGTTCTTATGAATATTTGACTCATG                     | This study |
| NZ_NdeI-del_R      | CATGAGTCAAATATTCATAAGAACCTTTGATATAATCAAG                     | This study |
| MCS2-F-Xba         | TTCTAGAAATGTCACCTAACCTGCCC                                   | This study |
| MCS2-R-Hind        | TAAGCTTCTCGAGGAGCTCACATGTCATATGGAGTGCCTCCTTATAATTTATT<br>TTG | This study |
| pNZ-F1498          | TAACAATAGAAAGCGTTAGG                                         | This study |
| pNZ-F3072          | ATGAGATAATGCCGACTG                                           | This study |
| USP-F-Nde          | TCATATGGCTAAAAAAAAGATTATCTCAG                                | This study |
| A3b-R-Xho          | TCTCGAGTTATTCTTCCATTACACCAATTTG                              | This study |
| IRFP-F-Nde         | TCATATGGCTGAGGGATCTGTAG                                      | This study |
| IRFP-R-Xho         | TCTCGAGTTATTCTTCCATTACACCAATTTGC                             | This study |
| A3b-R-Xho2         | TTATTTCTCGAGTTATTTTATTCGTAGATACTGACC                         | This study |
| USP-F-Nde2         | TTATTTTCATATGGCTAAAAAAAAGATTATCTCAG                          | This study |
| RBS_MCS2_Xba_F     | ATCTAGAATTATAAGGAGGCACTCCATATGACATGTGAGC                     | This study |
| RBS_MCS2_Hind_R    | TAAGCTTCTCGAGGAGCTCACATGTCATATGGAGTGCCTC                     | This study |
| TT-Xba-F           | AAAATATCTAGAGATAAAGCAATTAATGATATTGC                          | This study |
| TT-Spe-R           | TCACAACTAGTAATAAACGCTAAAACGTCTC                              | This study |
| Nis-woRBS-BgIII-F  | AAATTAAGATCTAGTCTTATAACTATACTGAC                             | This study |
| Nis-woRBS-AatXba-R | AAATTATCTAGAATCGATGACGTCATTGTATCTAACAACTTCAG                 | This study |
| MCS2-Xba-F2        | AAATAATCTAGAAATGTCACCTAACCTGCCC                              | This study |
| MCS2-XhoPacHind-R  | ATTATTAAGCTTTTAATTAACCGGTCTCGAGTGCCTCCTTATAATTTATTTTG        | This study |
| Cas-Xho-F          | AATTTACTCGAGATGGATAAGAAATACTCAATAGGC                         | This study |
| Cas-Pac-R          | ATTTGCTTAATTAATCAGTCACCTCCTAGCTG                             | This study |
| sg_erm3-F          | GACGTCTTGGATATTCACCGAACACTGTTTTAGAGCTAGAAATAGCAAGTTA         | This study |

|                           |                                                                                                             |            |
|---------------------------|-------------------------------------------------------------------------------------------------------------|------------|
|                           | AAATAAGGCTAGTCCGTTATC <sup>1</sup>                                                                          |            |
| sg_erm3-R                 | TCTAGAAAAGCACCGACTCGGTGCCACTTTTTCAAGTTGATAACGGACTAGC<br>CTTATTTTAACTTGC                                     | This study |
| sg_htrA_F                 | AGACGTCACGGATGCTGCCATTAACCCGTTTTAGAGCTAGAAATAGCAAG <sup>1</sup>                                             | This study |
| sg_upp_F                  | GACGTCGAGAGTTTGTGTTGAATCAAGTTTATAGAGCTAGAAATAGCAAG <sup>1</sup>                                             | This study |
| sgRNA-R                   | TCTAGAAAAGCACCGACTCG                                                                                        | This study |
| Cas_seq1                  | GATTTAGATAATTTATTGGCGC                                                                                      | This study |
| Cas_seq2                  | ATCGAAAAGTAACCGTTAAGC                                                                                       | This study |
| Cas_seq3                  | GATTATGATGTCGATCACATTG                                                                                      | This study |
| upp97                     | GTTGACGAAATCGGAATGCT                                                                                        | This study |
| upp291                    | CACACGAGCAGCTGGAATTA                                                                                        | This study |
| ldh38                     | GTGACGGTGTGTAGGTTTC                                                                                         | 1          |
| ldh159                    | ATGAGAAAGGTCTTCTGCATCC                                                                                      | 1          |
| rec912                    | ATCTGGTGCTTGGTTTGCTT                                                                                        | This study |
| rec1028                   | GCCCGAACTTTGTGGTCTATT                                                                                       | This study |
|                           |                                                                                                             |            |
| <i>Plasmids</i>           |                                                                                                             |            |
| pNZ8148                   | pSH71 derivative, PnisA, CmR, nisin-controlled expression                                                   | 2-4        |
| pIAV7                     | pWV01 derivative, broad range, EmR, <i>lacZ</i> , T1T2                                                      | 5          |
| pVPL3004                  | pNZ9530 derivative, EmR, <i>nisRK</i> replaced with the tracrRNA, cas9 and CRISPR array                     | 6          |
| pNZ8148m                  | pNZ8148ΔNdeI                                                                                                | This study |
| pNZDual                   | pNZ8148 derivative, two nisin promoters, MCS1, MCS2                                                         | This study |
| pNZPolycist               | pNZ8148 derivative, nisin promoter, MCS1, MCS2, separated by RBS                                            | This study |
| pNZDualTT                 | pNZ8148 derivative, two nisin promoters, MCS1, MCS2, two TT                                                 | This study |
| pNZ-IRFP713               | pNZ8148 containing <i>irfp713</i>                                                                           | 7          |
| pSD-I07                   | pNZ8148 containing gene fusion of SP <sub>Usp45</sub> , DARPIn I07 and cA                                   | 8          |
| pNZDual_DARPIn1           | pNZDual containing fusion of SP <sub>Usp45</sub> , DARPIn I07 and cA in MCS1                                | This study |
| pNZDual_DARPIn2           | pNZDual containing fusion of SP <sub>Usp45</sub> , DARPIn I07 and cA in MCS2                                | This study |
| pNZDual_IRFP1             | pNZDual containing <i>irfp713</i> in MCS1                                                                   | This study |
| pNZDual_IRFP2             | pNZDual containing <i>irfp713</i> in MCS2                                                                   | This study |
| pNZDual_DARPIn1_IRFP2     | pNZDual containing fusion of SP <sub>Usp45</sub> , DARPIn I07 and cA in MCS1 and <i>irfp713</i> in MCS2     | This study |
| pNZDual_IRFP1_DARPIn2     | pNZDual containing <i>irfp713</i> in MCS1 and fusion of SP <sub>Usp45</sub> , DARPIn I07 and cA in MCS2     | This study |
| pNZPolycist_DARPIn1_IRFP2 | pNZPolycist containing fusion of SP <sub>Usp45</sub> , DARPIn I07 and cA in MCS1 and <i>irfp713</i> in MCS2 | This study |
| pNZPolycist_IRFP1_DARPIn2 | pNZPolycist containing <i>irfp713</i> in MCS1 and fusion of SP <sub>Usp45</sub> , DARPIn I07 and cA in MCS2 | This study |
| pNZDualTT_DARPIn1_IRFP2   | pNZDualTT containing fusion of SP <sub>Usp45</sub> , DARPIn I07 and cA in MCS1 and <i>irfp713</i> in MCS2   | This study |
| pNZDualTT_IRFP1_DARPIn2   | pNZDualTT containing <i>irfp713</i> in MCS1 and fusion of SP <sub>Usp45</sub> , DARPIn I07 and cA in MCS2   | This study |
| pNZ8148noRBS              | pNZ8148 derivative without RBS after nisin promoter                                                         | This study |
| pNZ8148noRBS_dual PnisA   | pNZ8148noRBS derivative, second nisin promoters                                                             | This study |

|                 |                                                             |              |
|-----------------|-------------------------------------------------------------|--------------|
| pGEMsgHtr       | pGEM-T Easy containing sgHtr                                | This study   |
| pGEMsgErm       | pGEM-T Easy containing sgErm                                | This study   |
| pGEMsgUpp       | pGEM-T Easy containing sgUpp                                | This study   |
| pNZCRISPR       | pNZ8148noRBS_dualPnisA derivative with <i>cas9</i> in MCS2  | This study   |
| pNZCRISPRsgErm  | pNZCRISPR with sgErm in MCS1                                | This study   |
| pNZCRISPRsgHtr  | pNZCRISPR with sgHtr in MCS1                                | This study   |
| pNZCRISPRi      | pNZ8148noRBS_dualPnisA derivative with <i>dcas9</i> in MCS2 | This study   |
| pcDNA-dCAS9     | pcDNA3.1 derivative with <i>dcas9</i>                       | <sup>9</sup> |
| pNZCRISPRisgUpp | pNZCRISPRi with sgUpp in MCS1                               | This study   |

<sup>1</sup>Protospacer is shown in bold.

## References:

- 1 Friedrich, U. & Lenke, J. Improved enumeration of lactic acid bacteria in mesophilic dairy starter cultures by using multiplex quantitative real-time PCR and flow cytometry-fluorescence in situ hybridization. *Applied and environmental microbiology* **72**, 4163-4171, doi:10.1128/AEM.02283-05 (2006).
- 2 de Ruyter, P. G., Kuipers, O. P. & de Vos, W. M. Controlled gene expression systems for *Lactococcus lactis* with the food-grade inducer nisin. *Applied and environmental microbiology* **62**, 3662-3667 (1996).
- 3 Kuipers, O. P., de Ruyter, P. G. G. A., Kleerebezem, M. & de Vos, W. M. Quorum sensing-controlled gene expression in lactic acid bacteria. *J Biotechnol* **64**, 15-21 (1998).
- 4 Mierau, I. & Kleerebezem, M. 10 years of the nisin-controlled gene expression system (NICE) in *Lactococcus lactis*. *Applied microbiology and biotechnology* **68**, 705-717, doi:10.1007/s00253-005-0107-6 (2005).
- 5 Perez-Arellano, I., Zuniga, M. & Perez-Martinez, G. Construction of compatible wide-host-range shuttle vectors for lactic acid bacteria and *Escherichia coli*. *Plasmid* **46**, 106-116, doi:10.1006/plas.2001.1531 (2001).
- 6 Oh, J. H. & van Pijkeren, J. P. CRISPR-Cas9-assisted recombineering in *Lactobacillus reuteri*. *Nucleic acids research* **42**, e131, doi:10.1093/nar/gku623 (2014).
- 7 Berlec, A., Završnik, J., Butinar, M., Turk, B. & Strukelj, B. In vivo imaging of *Lactococcus lactis*, *Lactobacillus plantarum* and *Escherichia coli* expressing infrared fluorescent protein in mice. *Microbial cell factories* **14**, 181, doi:10.1186/s12934-015-0376-4 (2015).
- 8 Zadavec, P., Strukelj, B. & Berlec, A. Improvement of LysM-mediated surface display of designed ankyrin repeat proteins (DARPs) in recombinant and nonrecombinant strains of *Lactococcus lactis* and *Lactobacillus* Species. *Applied and environmental microbiology* **81**, 2098-2106, doi:10.1128/AEM.03694-14 (2015).
- 9 Perez-Pinera, P. *et al.* RNA-guided gene activation by CRISPR-Cas9-based transcription factors. *Nature methods* **10**, 973-976, doi:10.1038/nmeth.2600 (2013).
